# Supplementary material for: Routine Adoption of TIMP2 and IGFBP7 Biomarkers in Cardiac Surgery for Early Identification of Acute Kidney Injury
Source: PubMed Central journal article supplement — Int J Artif Organs. 2018 Jan 10;40(12):714–8. doi: 10.5301/ijao.5000661 (PMC6154726; doi:10.5301/ijao.5000661), 2018-01-10
Supplement: 10.5301_ijao.5000661_SupplementaryTables.pdf [file 10.5301_ijao.5000661_SupplementaryTables.pdf]

**Supplementary Table I A. 2014 cohort - Baseline characteristics**

|                                          | <b>All Patients<br/>(N=332)</b> | <b>No Acute Kidney<br/>Injury (N=253)</b> | <b>Acute Kidney<br/>Injury (N=79)</b> | <b>P value</b> |
|------------------------------------------|---------------------------------|-------------------------------------------|---------------------------------------|----------------|
| <b>Demographics</b>                      |                                 |                                           |                                       |                |
| Age – years                              |                                 |                                           |                                       | 0.0001         |
| Median                                   | 69                              | 67                                        | 74                                    |                |
| Interquartile range                      | 59-76                           | 57-74                                     | 67-79                                 |                |
| Female sex – no. (%)                     | 106 (31.93)                     | 79 (31.22)                                | 27 (34.81)                            | 0.6232         |
| Body mass index – kg/m <sup>2</sup>      |                                 |                                           |                                       | 0.1012         |
| Median                                   | 25.51                           | 25.24                                     | 26.42                                 |                |
| Interquartile range                      | 23.39-28.08                     | 23.36-27.73                               | 23.51-30.09                           |                |
| <b>Comorbidities – no. (%)</b>           |                                 |                                           |                                       |                |
| Hypertension                             | 317 (95.48)                     | 177 (69.96)                               | 63 (79.75)                            | 0.0898         |
| Diabetes mellitus                        | 37 (11.4)                       | 24 (9.49)                                 | 13 (16.46)                            | 0.0857         |
| Peripheral vasculopathy                  | 11 (3.3)                        | 6 (2.37)                                  | 5 (6.33)                              | 0.0862         |
| Chronic obstructive<br>pulmonary disease | 39 (11.74)                      | 25 (9.88)                                 | 14 (17.72)                            | 0.0589         |
| Obesity                                  | 55 (16.57)                      | 32 (12.56)                                | 23 (29.11)                            | 0.0006         |
| Previous heart surgery                   | 55 (16.57)                      | 41 (16.21)                                | 14 (17.72)                            | 0.7517         |

**Supplementary Table I B. 2014 Cohort - Process of care and outcomes.**

|                                                              | <b>All Patients<br/>(N=332)</b> | <b>No Acute Kidney<br/>Injury (N=253)</b> | <b>Acute Kidney<br/>Injury (N=79)</b> | <b>P Value</b> |
|--------------------------------------------------------------|---------------------------------|-------------------------------------------|---------------------------------------|----------------|
| <b>Surgical clinical data</b>                                |                                 |                                           |                                       |                |
| Aortic cross-clamp (min)                                     |                                 |                                           |                                       | 0.6378         |
| Median                                                       | 70                              | 70                                        | 75                                    |                |
| Interquartile range                                          | 52-96                           | 53-92                                     | 50-100                                |                |
| Extracorporeal circulation time<br>(min)                     |                                 |                                           |                                       | 0.1827         |
| Median                                                       | 107                             | 106                                       | 113                                   |                |
| Interquartile range                                          | 82-134                          | 82-128                                    | 82-149                                |                |
| urgency/emergency – no. (%)                                  | 69 (20.78)                      | 46 (18.18)                                | 23 (29.11)                            | 0.0366         |
| Coronary artery bypass graft<br>only – no. (%)               | 115 (34.64)                     | 73 (28.85)                                | 42 (53.16)                            | 0.0001         |
| Valve only – no. (%)                                         | 194 (58.43)                     | 165 (65.22)                               | 29 (36.71)                            | 0.0000         |
| Aorta – no. (%)                                              | 23 (6.93)                       | 15 (5.93)                                 | 8 (10.13)                             | 0.1996         |
| Minimal invasive (port access<br>mini thoracotomy) – no. (%) | 139 (41.87)                     | 127 (50.20)                               | 12 (15.19)                            | 0.0000         |
| <b>Intensive care unit clinical<br/>data</b>                 |                                 |                                           |                                       |                |
| Postoperative lactate                                        |                                 |                                           |                                       | 0.0955         |
| Median                                                       | 1.79                            | 1.73                                      | 2.17                                  |                |
| Interquartile range                                          | 1.26-2.73                       | 1.25-2.66                                 | 1.29-2.84                             |                |
| Renal replacement therapy –<br>no. (%)                       | 3 (0.9)                         | 0                                         | 3 (0.04)                              | 0.0798         |
| Furosemide day 1 (mg)                                        |                                 |                                           |                                       | 0.0001         |
| Median                                                       | 20                              | 20                                        | 40                                    |                |
| Interquartile range                                          | 10-40                           | 10-40                                     | 20-80                                 |                |
| Stroke – no. (%)                                             | 2 (0.6)                         | 2 (0.79)                                  | 0                                     | 0.4280         |
|                                                              | <b>All Patients<br/>(N=332)</b> | <b>No Acute Kidney<br/>Injury (N=253)</b> | <b>Acute Kidney<br/>Injury (N=79)</b> | <b>P Value</b> |
| <b>Intensive care unit clinical<br/>data</b>                 |                                 |                                           |                                       |                |
| Hospital stay – days (mean)                                  | 7.94                            | 7.43                                      | 9.59                                  | 0.0001         |
| Median                                                       | 9                               | 8                                         | 12                                    |                |
| Interquartile range                                          | 7-13                            | 7-12                                      | 9-18                                  |                |

**Supplementary Table I C. 2014 Cohort - Renal function and biomarker characteristics.**

|                                                                         | <b>All Patients<br/>(N=332)</b> | <b>No Acute Kidney<br/>Injury (N=253)</b> | <b>Acute Kidney<br/>Injury (N=79)</b> | <b>P value</b> |
|-------------------------------------------------------------------------|---------------------------------|-------------------------------------------|---------------------------------------|----------------|
| Serum creatinine – mg/dl                                                |                                 |                                           |                                       |                |
| Preoperative                                                            |                                 |                                           |                                       | 0.0001         |
| Median                                                                  | 0.92                            | 0.9                                       | 1.04                                  |                |
| Interquartile range                                                     | 0.8-1.08                        | 0.78-1.05                                 | 0.87-1.19                             |                |
| Postoperative                                                           |                                 |                                           |                                       | 0.0011         |
| Median                                                                  | 0.84                            | 0.81                                      | 1.04                                  |                |
| Interquartile range                                                     | 0.74-1.04                       | 0.7-0.94                                  | 0.82-1.3                              |                |
| Estimated glomerular<br>filtration rate – ml/min/1.73<br>m <sup>2</sup> |                                 |                                           |                                       |                |
| Preoperative                                                            |                                 |                                           |                                       | 0.0001         |
| Median                                                                  | 79.5                            | 85                                        | 70                                    |                |
| Interquartile range                                                     | 65-93                           | 68-94                                     | 55-80                                 |                |

**Supplementary Table II A. 2015 cohort - Baseline characteristics.**

|                                          | All Patients<br>(N=110) | No Acute Kidney<br>Injury (N=95) | Acute Kidney<br>Injury (N=15) | P Value |
|------------------------------------------|-------------------------|----------------------------------|-------------------------------|---------|
| <b>Demographics</b>                      |                         |                                  |                               |         |
| Age – years                              |                         |                                  |                               | 0.0342  |
| Median                                   | 62                      | 61                               | 71                            |         |
| Interquartile range                      | 53-71                   | 52-69                            | 59-75                         |         |
| Female sex – no. (%)                     | 32 (29.09)              | 28 (29.47)                       |                               | 0.8240  |
| Body mass index – kg/m <sup>2</sup>      |                         |                                  |                               | 0.0172  |
| Median                                   | 25.34                   | 25.14                            | 28.58                         |         |
| Interquartile range                      | 23.44-28.09             | 23.12-27.68                      | 23.87-31.07                   |         |
| <b>Comorbidities – no. (%)</b>           |                         |                                  |                               |         |
| Hypertension                             | 64 (58.18)              | 53 (55.79)                       | 11 (73.33)                    | 0.2005  |
| Diabetes mellitus                        | 10 (9.09)               | 7 (7.37)                         | 3 (20)                        | 0.1138  |
| Peripheral vasculopathy                  | 4 (3.64)                | 2 (2.11)                         | 2 (13.33)                     | 0.0309  |
| Chronic obstructive<br>pulmonary disease | 8 (7.27)                | 7 (7.37)                         | 1 (6.67)                      | 0.9225  |
| Obesity                                  | 14 (12.73)              | 9 (9.47)                         | 5 (33.33)                     | 0.0100  |
| Previous heart surgery                   | 5 (4.55)                | 3 (3.16)                         | 2 (13.33)                     | 0.0787  |

**Supplementary Table II B. 2015 Cohort - Process of care and outcomes.**

|                                                              | <b>All Patients<br/>(N=110)</b> | <b>No Acute Kidney<br/>Injury (N=95)</b> | <b>Acute Kidney<br/>Injury (N=15)</b> | <b>P Value</b> |
|--------------------------------------------------------------|---------------------------------|------------------------------------------|---------------------------------------|----------------|
| <b>Surgical clinical data</b>                                |                                 |                                          |                                       |                |
| Aortic cross-clamp, min                                      |                                 |                                          |                                       | 0.3413         |
| Median                                                       | 78                              | 76.5                                     | 94.5                                  |                |
| Interquartile range                                          | 60-101                          | 60.5-98                                  | 64-113                                |                |
| Extracorporeal circulation<br>time – min                     |                                 |                                          |                                       | 0.0630         |
| Median                                                       | 112.5                           | 110                                      | 142                                   |                |
| Interquartile range                                          | 97-149                          | 96-144                                   | 105-158                               |                |
| urgency/emergency (%)                                        | 0                               | 0                                        | 0                                     |                |
| Coronary artery bypass graft<br>only – no. (%)               | 12 (10.91)                      | 8 (8.42)                                 | 4 (26.67)                             | 0.0352         |
| Valve only – no. (%)                                         | 85 (77.27)                      | 77 (81.05)                               | 8 (53.33)                             | 0.0173         |
| Aorta – no. (%)                                              | 13 (11.82)                      | 10 (10.53)                               | 3 (30)                                | 0.2909         |
| Minimal invasive (port access<br>mini thoracotomy) – no. (%) | 66 (60)                         | 63 (66.32)                               | 3 (20)                                | 0.0007         |
| <b>Intensive care unit clinical<br/>data</b>                 |                                 |                                          |                                       |                |
| Postoperative lactate                                        |                                 |                                          |                                       | 0.4374         |
| Median                                                       | 1.86                            | 1.81                                     | 2.01                                  |                |
| Interquartile range                                          | 1.35-2.41                       | 1.35-2.39                                | 1.32-3.21                             |                |
| Renal replacement therapy –<br>no. (%)                       | 1 (0.91)                        | 0                                        | 1 (6.67)                              | 0.0115         |
| Furosemide dose day 1 (mg)                                   |                                 |                                          |                                       | 0.3320         |
| Median                                                       | 10                              | 10                                       | 20                                    |                |
| Interquartile range                                          | 0-30                            | 0-30                                     | 0-40                                  |                |
| Stroke – no. (%)                                             | 0                               | 0                                        |                                       |                |
|                                                              | <b>All Patients<br/>(N=110)</b> | <b>No Acute Kidney<br/>Injury (N=95)</b> | <b>Acute Kidney<br/>Injury (N=15)</b> | <b>P Value</b> |
| <b>Intensive care unit clinical<br/>data</b>                 |                                 |                                          |                                       |                |
| Hospital stay – days                                         | 6.33                            | 5.76                                     | 9.93                                  | 0.8336         |
| Median                                                       | 7                               | 7                                        | 7                                     |                |
| Interquartile range                                          | 7-10                            | 7-10                                     | 7-9                                   |                |

**Supplementary Table II C. 2015 Cohort - Renal function and biomarker characteristics.**

|                          | All Patients (N=110) | No Acute Kidney Injury (N=95) | Acute Kidney Injury (N=15) | P Value |
|--------------------------|----------------------|-------------------------------|----------------------------|---------|
| Serum creatinine – mg/dl |                      |                               |                            |         |
| Preoperative             |                      |                               |                            | 0.0978  |
| Median                   | 0.82                 | 0.82                          | 0.86                       |         |
| Interquartile range      | 0.73-0.96            | 0.7-0.95                      | 0.8-1.1                    |         |
| Postoperative            |                      |                               |                            | 0.0003  |
| Median                   | 0.79                 | 0.77                          | 1                          |         |
| Interquartile range      | 0.69-0.88            | 0.69-0.86                     | 0.85-1.1                   |         |

**Supplementary Table III. Comparison of 2014-2015 cohorts (all patients)**

|                                        | 2014<br>n=332 |                     | 2015<br>n=110 |                     | P      |
|----------------------------------------|---------------|---------------------|---------------|---------------------|--------|
|                                        | Median        | Interquartile Range | Median        | Interquartile Range |        |
| Age                                    | 69            | 59-76               | 62            | 53-71               | 0.0001 |
| body mass index                        | 25.51         | 23.39-28.08         | 25.34         | 23.44-28.09         | 0.9734 |
| aortic cross-clamp time                | 70            | 52-96               | 78            | 60-101              | 0.073  |
| extracorporeal circulation time        | 107           | 82-134              | 112.5         | 97-149              | 0.0101 |
| postoperative lactate                  | 1.79          | 1.26-2.73           | 1.86          | 1.35-2.41           | 0.9060 |
| furosemide day 1                       | 20            | 10-40               | 10            | 0-30                | 0.0001 |
| hospital stay (days)                   | 9             | 7-13                | 7             | 7-10                | 0.7080 |
| preoperative Serum creatinine – mg/dl  | 0.92          | 0.8-1.08            | 0.82          | 0.73-0.96           | 0.0001 |
| postoperative Serum creatinine – mg/dl | 0.84          | 0.74-1.04           | 0.79          | 0.69-0.88           | 0.0011 |
|                                        | n             | %                   | n             | %                   | P      |
| AKI                                    | 79            | 23.80%              | 15            | 13.65%              | 0.0240 |
| AKI stage 1                            | 61            | 18.37%              | 11            | 10%                 | 0.0393 |
| AKI stage 2-3                          | 18            | 5.42%               | 4             | 3.64%               | 0.2783 |
| Female                                 | 106           | 31.93%              | 32            | 29%                 | 0.5779 |
| hypertension                           | 240           | 72.29%              | 64            | 58.18%              | 0.0057 |
| diabetes mellitus                      | 37            | 11.14%              | 10            | 9.09%               | 0.5448 |
| peripheral vasculopathy                | 11            | 3.31%               | 4             | 3.64%               | 0.8711 |
| chronic obstructive pulmonary disease  | 39            | 11.75%              | 8             | 7.27%               | 0.1871 |
| Obesity                                | 55            | 16.57%              | 14            | 12.73%              | 0.3363 |
| CKD                                    | 19            | 5.72%               | 0             | 0                   | 0.0103 |
| Previous heart surgery                 | 55            | 16.57%              | 5             | 4.55%               | 0.0014 |
| urgency/emergency                      | 69            | 20.78%              | 0             | 0%                  | 0.0000 |
| valve only                             | 194           | 58.43%              | 85            | 77.27%              | 0.0004 |
| Coronary artery                        | 115           | 34.64%              | 12            | 10.9%               | 0.0000 |

|                           |     |        |    |        |        |
|---------------------------|-----|--------|----|--------|--------|
| bypass graft only         |     |        |    |        |        |
| Aorta                     | 23  | 6.93%  | 13 | 11.81% | 0.1041 |
| minimal invasive          | 139 | 41.87% | 66 | 60%    | 0.0009 |
| renal replacement therapy | 3   | 0.9%   | 1  | 0.91%  | 0.9958 |
| stroke (ICU)              | 2   | 0.6%   | 0  | 0%     | 0.4146 |

**Supplementary Table IV. Specification Error Test for Logit Regression Model in unified cohorts (2014-2015 cohorts).**

| <b>Specification Error Test</b>    |              |                  |          | <b>Number of obs = 316</b> |                             |          |
|------------------------------------|--------------|------------------|----------|----------------------------|-----------------------------|----------|
|                                    |              |                  |          | LR chi2(2) = 108.60        |                             |          |
|                                    |              |                  |          | Prob > chi2 = 0.0000       |                             |          |
| <i>Log likelihood = -120.02563</i> |              |                  |          | Pseudo R2 = 0.3115         |                             |          |
| <b>akipost</b>                     | <b>Coef.</b> | <b>Std. Err.</b> | <b>z</b> | <b>P&gt;z</b>              | <b>[95% Conf. Interval]</b> |          |
| _hat                               | .9162684     | .1104711         | 8.29     | 0.000                      | .6997491                    | 1.132788 |
| _hatsq                             | -.0625851    | .0340019         | -1.84    | 0.066                      | -.1292275                   | .0040573 |
| _cons                              | .0812334     | .1981786         | 0.41     | 0.682                      | -.3071896                   | .4696564 |



**Supplementary Table V.  
Classification Table at 15%**

| Classified           | Actual |         | Total |
|----------------------|--------|---------|-------|
|                      | AKI    | non-AKI |       |
| AKI                  | 10     | 11      | 21    |
| non-AKI              | 3      | 81      | 84    |
| <b>Total</b>         | 13     | 92      | 105   |
| Sensitivity          |        | 76.92%  |       |
| Specificity          |        | 88.04%  |       |
| PPV                  |        | 47.62%  |       |
| NPV                  |        | 96.43%  |       |
| Correctly classified |        | 86.67%  |       |
| AUC                  |        | 89.63%  |       |

**Logit Model with NephroCheck as continuous variable.** AUC, area under the curve; NPV, negative predictive value; PPV, positive predictive value.
