# Supplementary figures and images for: Routine Adoption of TIMP2 and IGFBP7 Biomarkers in Cardiac Surgery for Early Identification of Acute Kidney Injury
Source: PubMed Central journal article supplement — Int J Artif Organs. 2018 Jan 10;40(12):714–8. doi: 10.5301/ijao.5000661 (PMC6154726; doi:10.5301/ijao.5000661), 2018-01-10

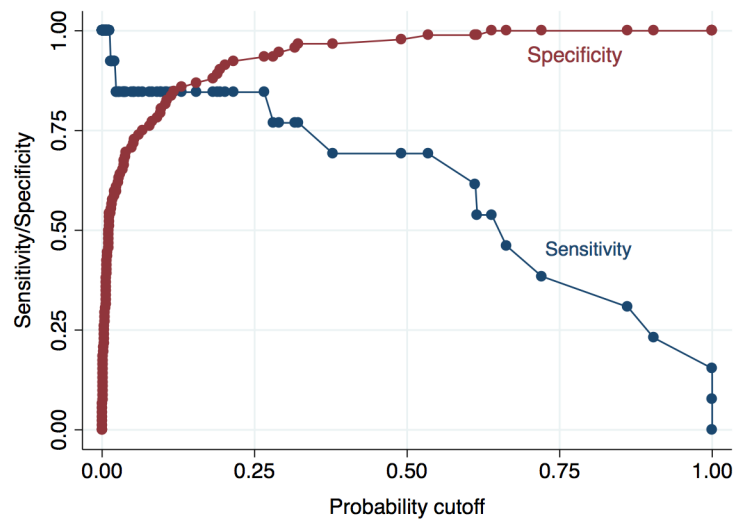

Supplement: 10.5301_ijao.5000661_SupplementaryFigure1.pdf [file 10.5301_ijao.5000661_SupplementaryFigure1.pdf]
